# Supplementary material for: Cu(ii)-mediated tautomerization for the pyrazole-nitrile coupling reaction
Source: Royal Society of Chemistry journal article supplement (doi:10.1039/d4dt02904f), 2024-12-17
Supplement: d4dt02904f1.pdf [file d4dt02904f1.pdf]

# Cu(II)-Mediated Tautomerization for the Pyrazole-Nitrile Coupling Reaction

Chang-Chih Hsieh,<sup>b</sup> Chia-Wei Chen,<sup>a</sup> Ming-Hsi Chiang,<sup>b,c</sup> and Yih-Chern Horng<sup>\*a</sup>

<sup>a</sup> Department of Chemistry, National Changhua University of Education, Changhua 50058, Taiwan

<sup>b</sup> Institute of Chemistry, Academia Sinica, Taipei 11528, Taiwan

<sup>c</sup> Department of Medicinal and Applied Chemistry, Kaohsiung Medical University, Kaohsiung 80708, Taiwan

\* Email: [ychorng@cc.ncue.edu.tw](mailto:ychorng@cc.ncue.edu.tw)

## Electronic Supporting Information

### Table of Contents

|                      | <b>Title</b>                                                                                                                                    | <b>P.</b> |
|----------------------|-------------------------------------------------------------------------------------------------------------------------------------------------|-----------|
| <b>Figure S1-S6</b>  | The time-dependent UV-vis spectra of one-pot reaction with R-PzH                                                                                | 2-3       |
| <b>Figure S7</b>     | <sup>1</sup> H NMR spectrum of one-pot reaction of 3-( <i>t</i> -Bu)PzH in <i>d</i> -MeCN                                                       | 4         |
| <b>Figure S8</b>     | The time-dependent UV-vis spectra of one-pot reaction with 3-BrPzH or 3-IPzH                                                                    | 4         |
| <b>Figure S9-S20</b> | ORTEP drawings and packing diagrams of the complexes                                                                                            | 5-16      |
| <b>Figure S21</b>    | The time-dependent <sup>1</sup> H NMR spectra of <b>2a</b> or <b>2d</b> dissolved in <i>d</i> -MeCN                                             | 17        |
| <b>Table S1-S2</b>   | The optimized structures of predicted geometries and their energy differences compared to the most stable structure for <b>2a</b> and <b>2d</b> | 18-19     |
| <b>Table S3</b>      | The summary of crystallographic data for the complexes                                                                                          | 20-22     |

## Supplementary Tables and Figures

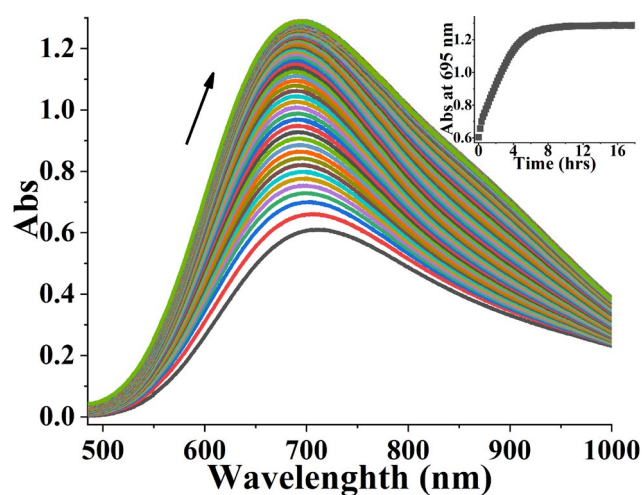

**Figure S1.** The time-dependent UV-vis spectra of a 4-fold excess of 3-ClPzH reacted with  $\text{Cu}(\text{ClO}_4)_2 \cdot 6\text{H}_2\text{O}$  in MeCN at 298 K.

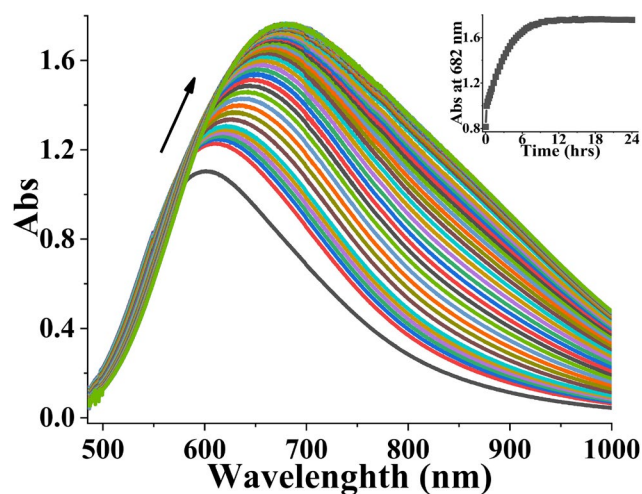

**Figure S2.** The time-dependent UV-vis spectra of a 4-fold excess of 3-MePzH reacted with  $\text{Cu}(\text{ClO}_4)_2 \cdot 6\text{H}_2\text{O}$  in MeCN at 298 K.

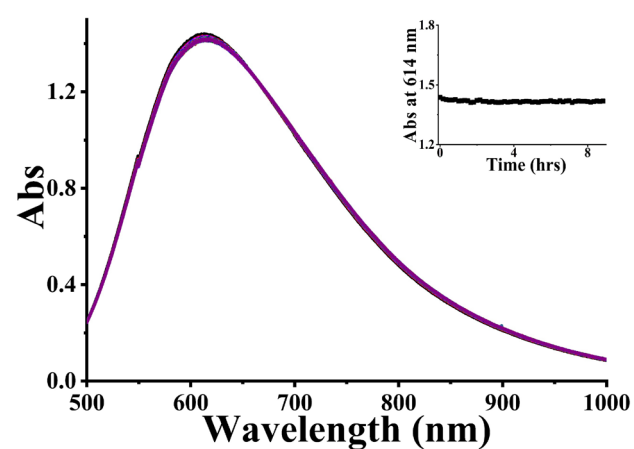

**Figure S3.** The time-dependent UV-vis spectra of a 4-fold excess of 3-(*t*-Bu)PzH reacted with  $\text{Cu}(\text{ClO}_4)_2 \cdot 6\text{H}_2\text{O}$  in MeCN at 298 K.

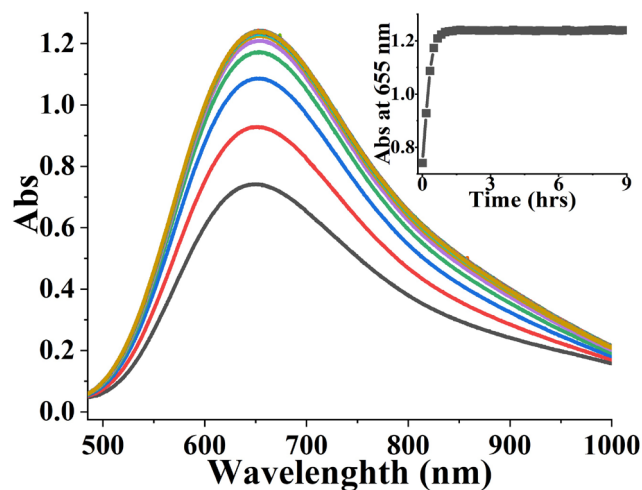

**Figure S4.** The time-dependent UV-vis spectra of a 4-fold excess of 4-ClPzH reacted with  $\text{Cu}(\text{ClO}_4)_2 \cdot 6\text{H}_2\text{O}$  in MeCN at 298 K.

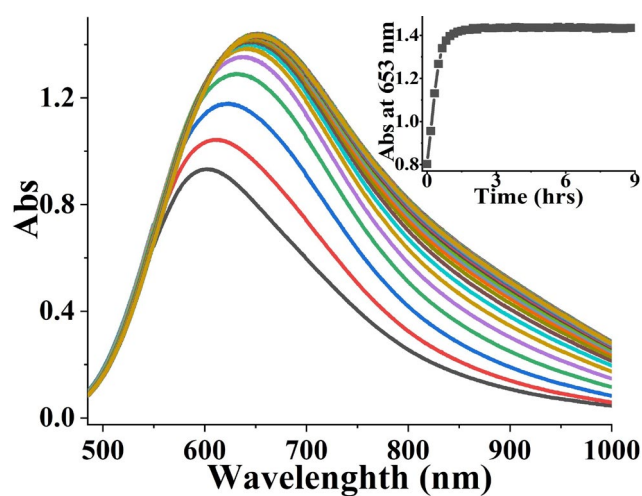

**Figure S5.** The time-dependent UV-vis spectra of a 4-fold excess of 4-MePzH reacted with  $\text{Cu}(\text{ClO}_4)_2 \cdot 6\text{H}_2\text{O}$  in MeCN at 298 K.

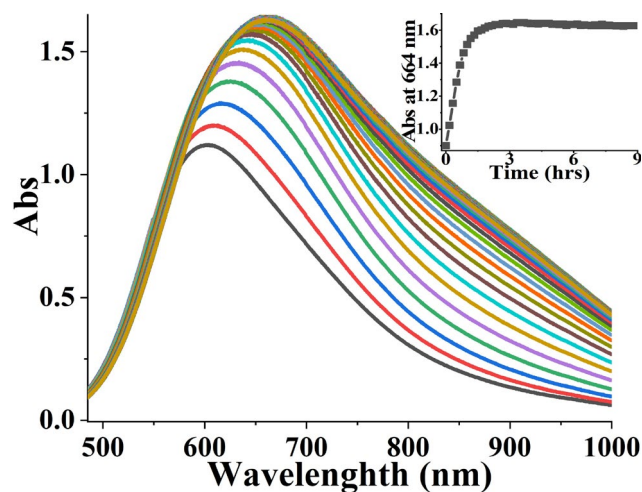

**Figure S6.** The time-dependent UV-vis spectra of a 4-fold excess of 4-(*t*-Bu)PzH reacted with  $\text{Cu}(\text{ClO}_4)_2 \cdot 6\text{H}_2\text{O}$  in MeCN at 298 K.

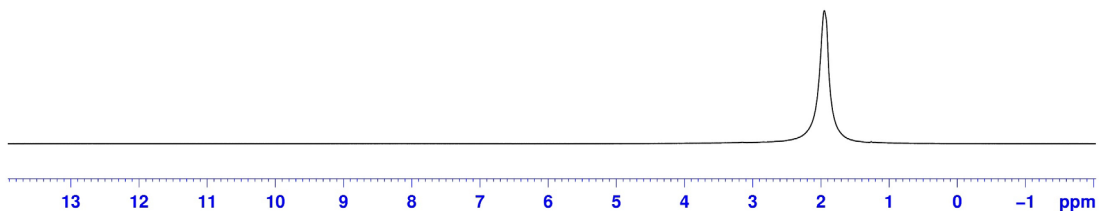

**Figure S7.**  $^1\text{H}$  NMR spectrum of a 4-fold excess 3-(*t*-Bu)PzH reacted with  $\text{Cu}(\text{ClO}_4)_2 \cdot 6\text{H}_2\text{O}$  in *d*-MeCN.

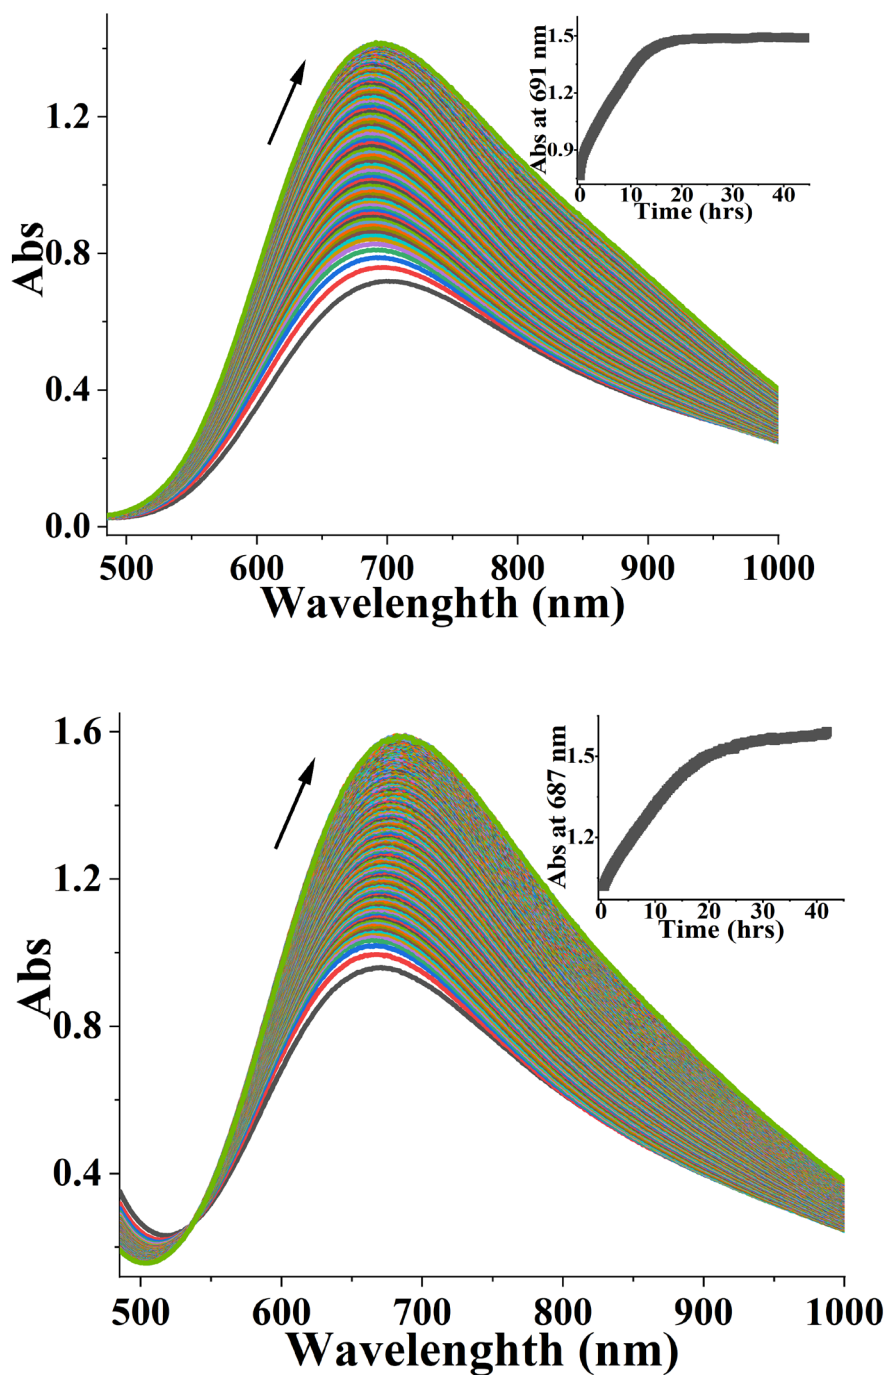

**Figure S8.** The time-dependent UV-vis spectra of a 4-fold excess of 3-BrPzH (top) or 3-IPzH (bottom) reacted with  $\text{Cu}(\text{ClO}_4)_2 \cdot 6\text{H}_2\text{O}$  in MeCN at 298 K.

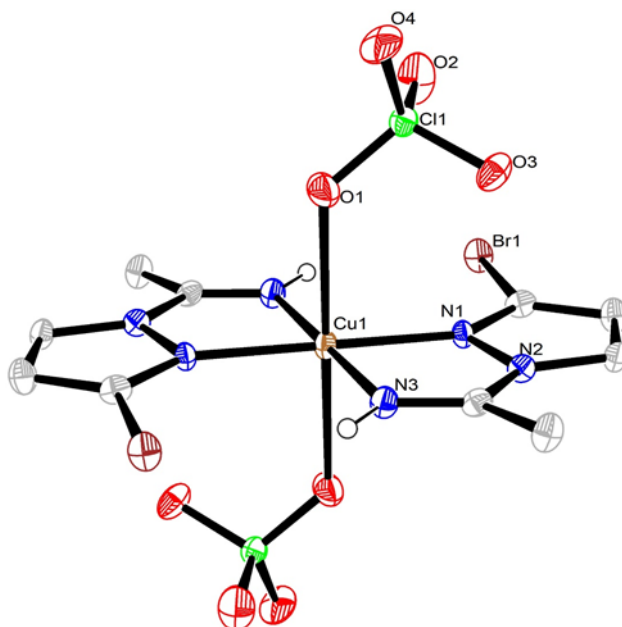

**Figure S9.** ORTEP style representation of **1b**. Thermal ellipsoids are drawn at the 35% probability level. The hydrogen atoms bound to carbon atoms were omitted for clarity. Selected bond lengths [Å] and angles [°]: Cu1-N1 2.016(3), Cu1-N3 1.974(3), Cu1-O1 2.468(3), N1-Cu1-N3 79.37(11), N1-Cu1-O1 93.05(11), N1-Cu1-N1A 180.0, N1-Cu1-N3A 100.63(11), N1-Cu1-O1A 86.95(11), N3-Cu1-O1 84.96(12), N3-Cu1-N3A 180.0(5), N3-Cu1-O1A 95.04(12). Symmetry transformations used to generate equivalent atoms: A  $-x+1, -y+1, -z+1$ .

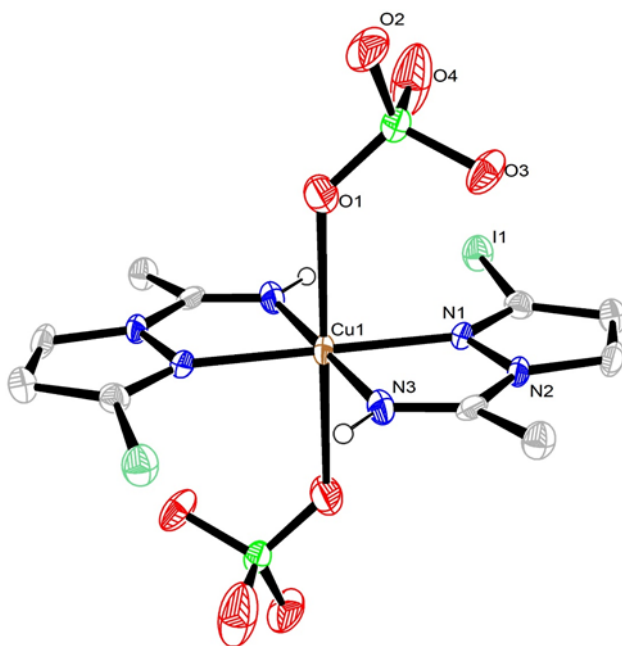

**Figure S10.** ORTEP style representation of **1c**. Thermal ellipsoids are drawn at the 35% probability level. The hydrogen atoms bound to carbon atoms were omitted for clarity. Selected bond lengths [Å] and angles [°]: Cu1-N1 2.043(4), Cu1-N3 1.975(5), Cu1-O1 2.461(4), Cu1-N1-N3 79.17(18), N1-Cu1-O1 88.75(15), N1-Cu1-N1A 180.0, N1-Cu1-N3A 100.83(18), N1-Cu1-O1A 91.25(15), N3-Cu1-O1 93.63(18), N3-Cu1-N3A 180.0, N3-Cu1-O1A 86.37(18). Symmetry transformations used to generate equivalent atoms: A  $-x+1, -y+1, -z+1$ .

(a)

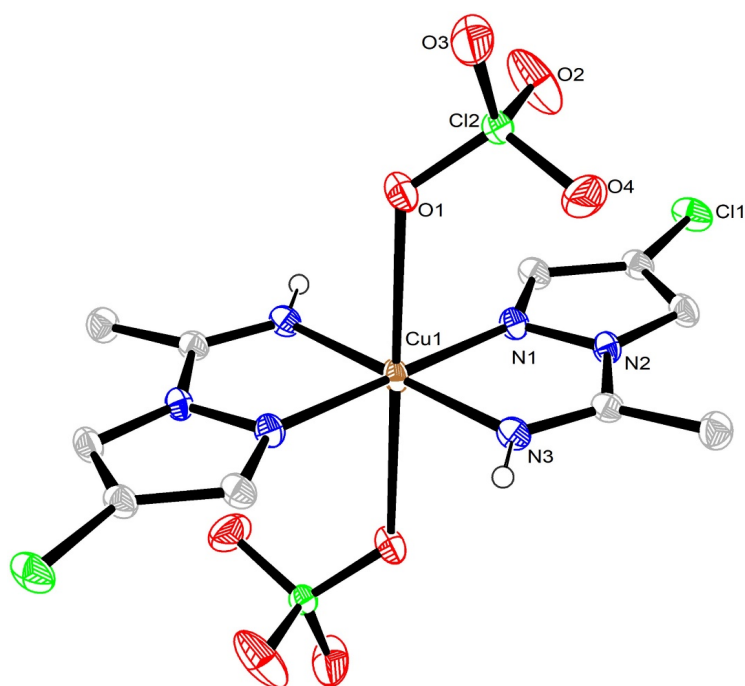

(b)

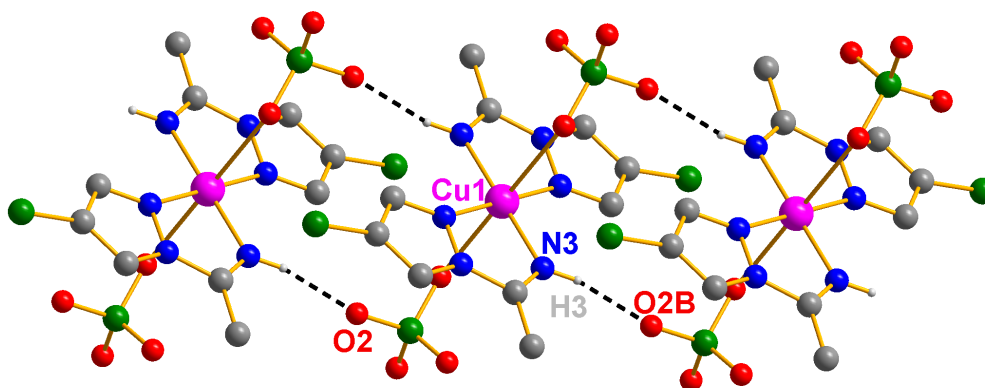

**Figure S11.** (a) ORTEP style representation of **1a'**. Thermal ellipsoids are drawn at the 35% probability level. The hydrogen atoms bound to carbon atoms were omitted for clarity. Selected bond lengths [Å] and angles [°]: Cu1-N1 1.9762(19), Cu1-N3 1.9688(19), Cu1-O1 2.6123(17), N1-Cu1-N3 80.36(8), N1-Cu1-O1 86.51(7), N1-Cu1-N1A 180.0, N1-Cu1-N3A 99.64(8), N1-Cu1-O1A 93.49(7), N3-Cu1-O1 90.39(7), N3-Cu1-N3A 180.0, N3-Cu1-O1A 89.61(7). Symmetry transformations used to generate equivalent atoms: A  $-x+1, -y+1, -z$ . (b) One-dimensional packing diagram with the black dashed lines showing the intermolecular NH...O hydrogen-bond interactions. Only the significant component is shown. H-bonding: N3...O2B 2.925(3) Å, H3...O2B 2.079(2) Å, N3-H3...O2B 167.6(1)°. Symmetry code: B  $1+x, y, z$ .

(a)

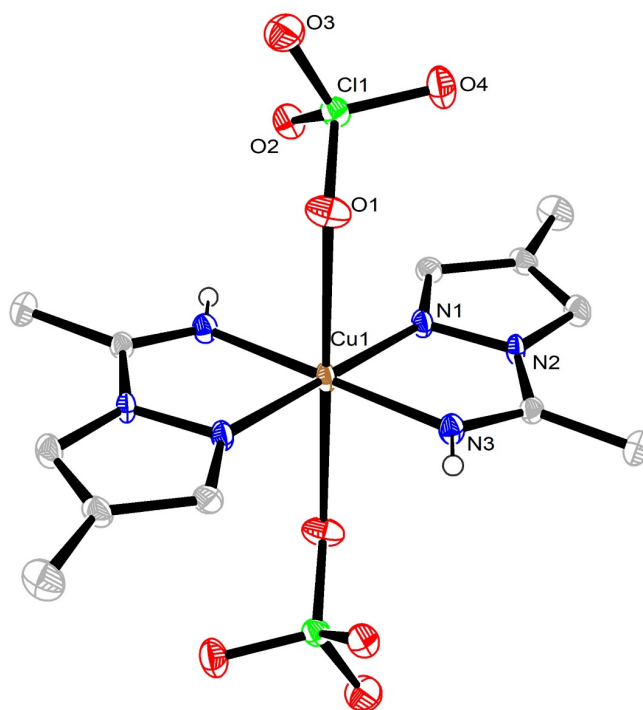

(b)

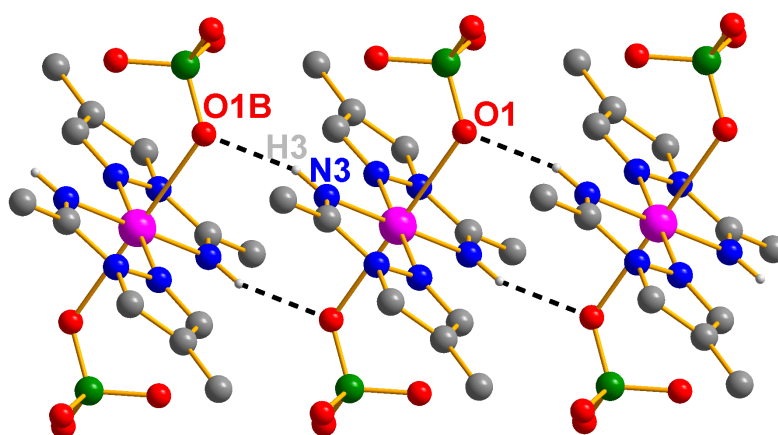

**Figure S12.** (a) ORTEP style representation of **1d'**. Thermal ellipsoids are drawn at the 35% probability level. The hydrogen atoms bound to carbon atoms were omitted for clarity. Selected bond lengths [Å] and angles [°]: Cu1-N1 1.980(2), Cu1-N3 1.962(2), Cu1-O1 2.532(2), N1-Cu1-N3 80.39(10), N1-Cu1-O1 89.20(9), N1-Cu1-N1A 180.00(4), N1-Cu1-N3A 99.61(10), N1-Cu1-O1A 90.80(9), N3-Cu1-O1 87.16(9), N3-Cu1-N1A 99.61(10), N3-Cu1-N3A 180.00(10), N3-Cu1-O1A 92.85(9). Symmetry transformations used to generate equivalent atoms: A  $-x, -y+2, -z$ . (b) One-dimensional packing diagram with the black dashed lines showing the intermolecular NH $\cdots$ O hydrogen-bond interactions. Only the significant component is shown. H-bonding: N3 $\cdots$ O1B 2.904(4) Å, H3 $\cdots$ O1B 2.063(3) Å, N3-H3 $\cdots$ O1B 159.9(2)°. Symmetry code: B  $-1+x, y, z$ .

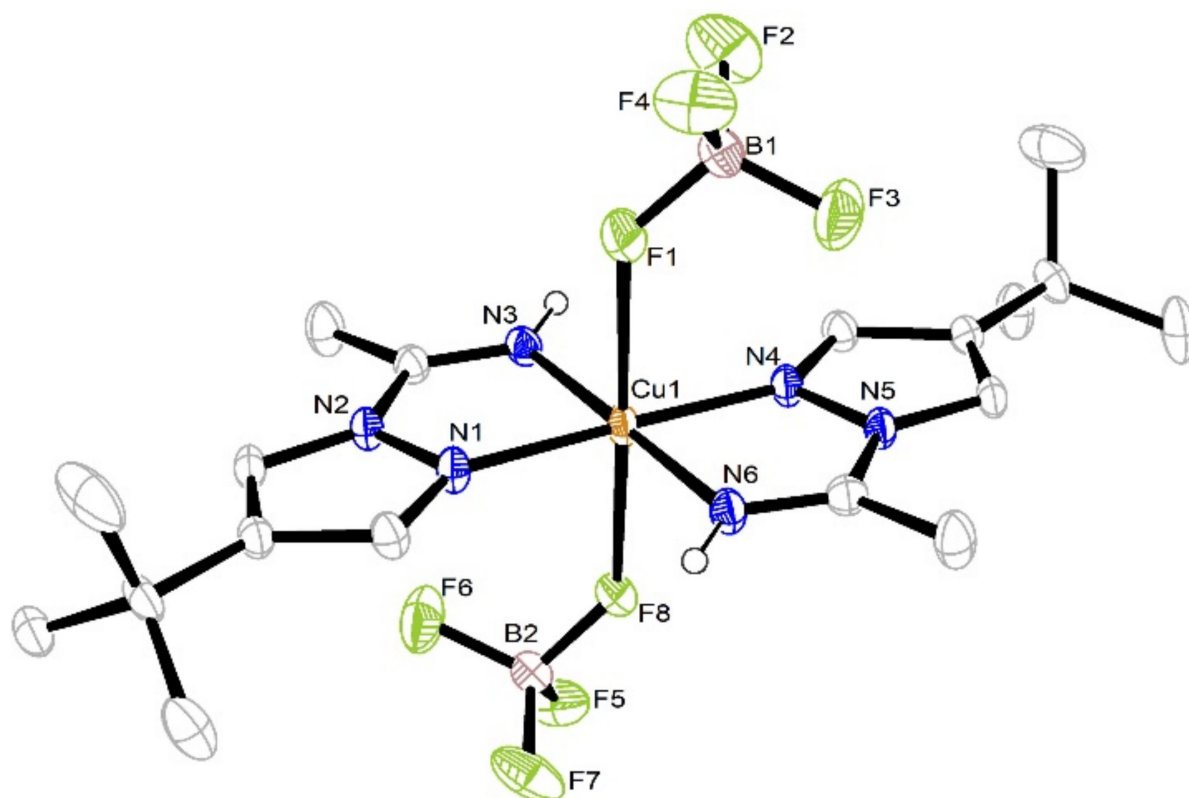

**Figure S13.** ORTEP style representation of **1e''**. Thermal ellipsoids are drawn at the 35% probability level. The hydrogen atoms bound to carbon atoms were omitted for clarity. Selected bond lengths [ $\text{\AA}$ ] and angles [ $^\circ$ ]: Cu1-N1 1.977(2), Cu1-N3 1.960(3), Cu1-N4 1.978(3), Cu1-N6 1.971(3), Cu1-F1 2.525(3), Cu1-F8 2.554(3), N1-Cu1-N3 80.64(12), N1-Cu1-N4 178.69(18), N1-Cu1-N6 98.91(12), N1-Cu1-F1 88.58(12), N1-Cu1-F8 91.33(11), N3-Cu1-N4 99.90(12), N3-Cu1-N6 179.47(14), N3-Cu1-F1 95.10(11), N3-Cu1-F8 82.03(11), N4-Cu1-N6 80.54(12), N4-Cu1-F1 92.56(11), N4-Cu1-F8 87.57(11), N6-Cu1-F1 85.17(11), N6-Cu1-F8 97.70(12), F1-Cu1-F8 177.10(11).



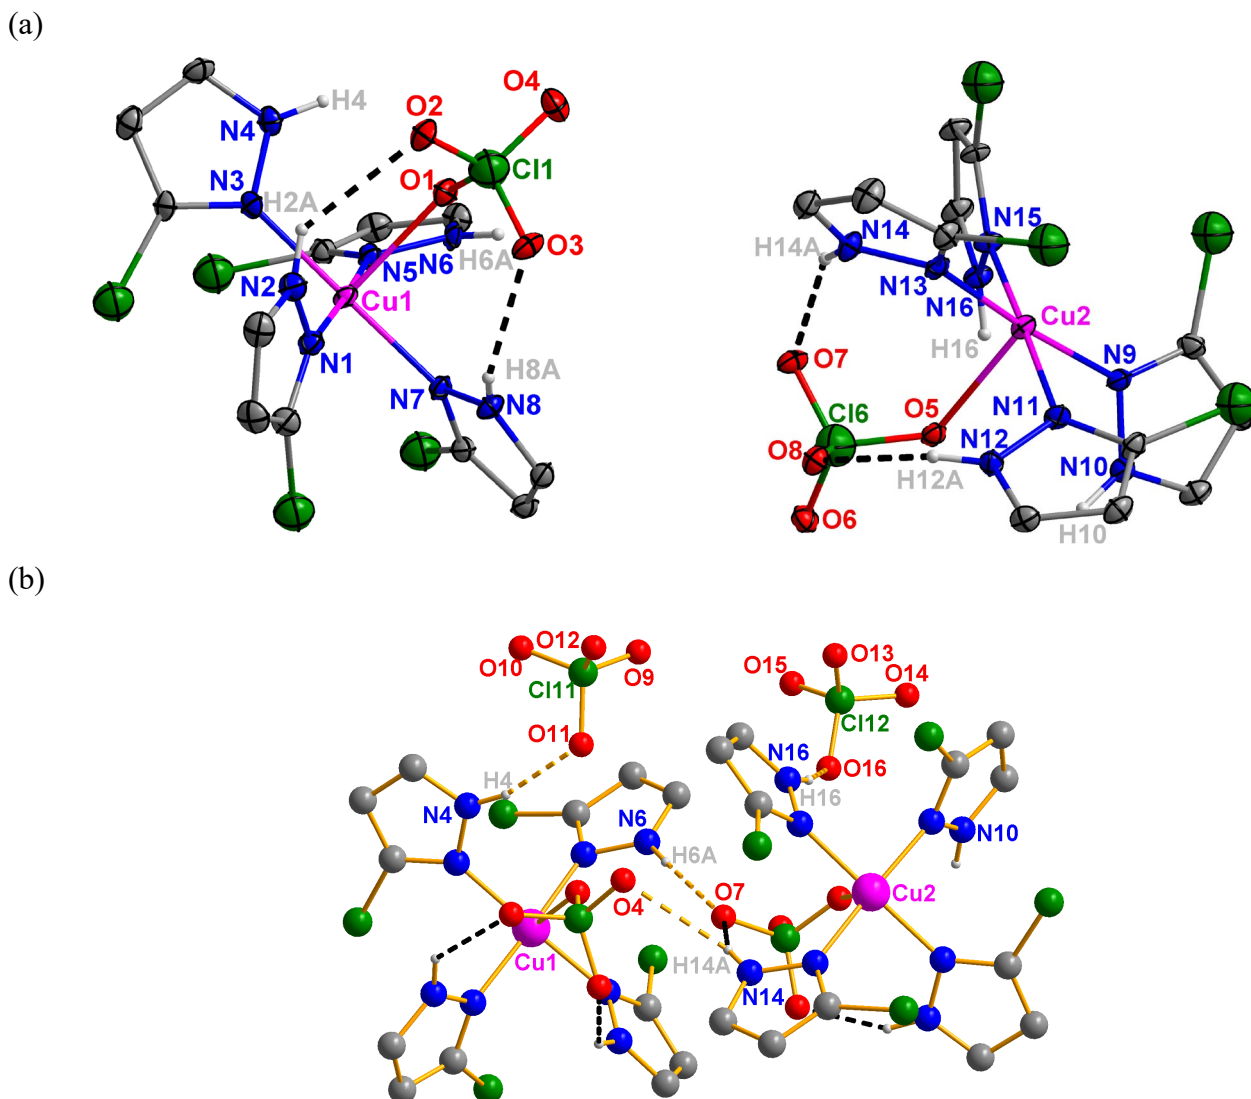

**Figure S14-1.** (a) ORTEP style representation of **2a** with the black dashed lines showing the intramolecular hydrogen-bond interactions. The structure has two independent molecules in the asymmetric unit cell. For each independent molecule (left and right), one unbound perchlorate counteranion is omitted for clarity and the thermal ellipsoids are drawn at the 35% probability level. (b) Ball-and-stick representation of **2a** with the yellow dashed lines showing the intermolecular hydrogen-bond interactions. The hydrogen atoms bound to carbon atoms were omitted for clarity. Selected bond lengths [Å] and angles [°]: Cu1-N1 2.007(5), Cu1-N3 2.013(5), Cu1-N5 1.985(5), Cu1-N7 2.020(5), Cu1-O1 2.285(5), N1-Cu1-N3 90.4(2), N1-Cu1-N5 174.7(2), N1-Cu1-N7 91.0(2), N1-Cu1-O1 101.2(2), N3-Cu1-N5 88.3(2), N3-Cu1-N7 178.6(2), N3-Cu1-O1 88.60(19), N5-Cu1-N7 90.4(2), N5-Cu1-O1 83.90(19), N7-Cu1-O1 91.08(19); Cu2-N9 1.994(5), Cu2-N11 2.006(5), Cu2-N13 2.004(5), Cu2-N15 1.996(5), Cu2-O5 2.303(4), N9-Cu2-N11 89.0(2), N9-Cu2-N13 174.4(2), N9-Cu2-N15 89.4(2), N9-Cu2-O5 82.83(18), N11-Cu2-N13 89.7(2), N11-Cu2-N15 177.1(2), N11-Cu2-O5 90.02(18), N13-Cu2-N15 92.1(2), N13-Cu2-O5 102.60(18), N15-Cu2-O5 87.36(18). H-bonding: N2...O2 3.068(8), H2...O2 2.368(5), N2-H2...O2 136.6(4); N8...O3 2.90(7), H8...O3 2.211(5), N8-H8...O3 136.1(4); N12...O8 3.027(7), H12...O8 2.231(5), N12-H12...O8 150.3(4); N14...O7 2.948(7), H14...O7 2.172(5), N14-H14...O7 146.9(4); N4...O11 2.840(8), H4...O11 1.984(5), N4-H4...O11 163.8(4); N6...O7 2.918(7), H6...O7 2.054(5), N6-H6...O7 167.1(4); N14...O4 3.156(7), H14...O4 2.568(5), N14-H14...O4 125.0(4); N16...O16 2.825(7), H16...O16 1.975(4), N16-H16...O16 162.0(3).

(a)

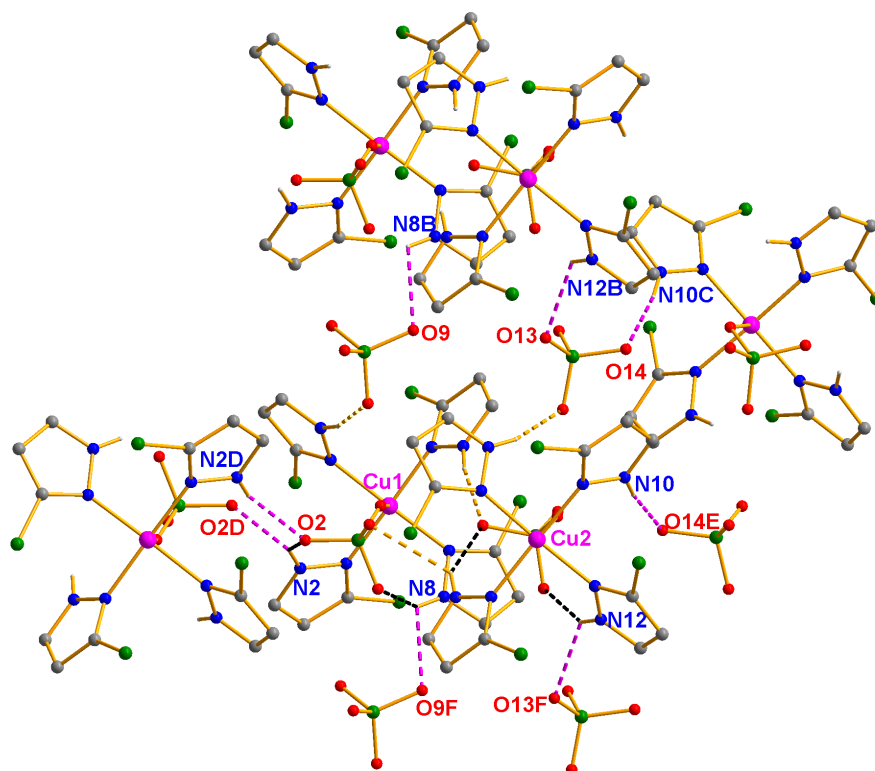

(b)

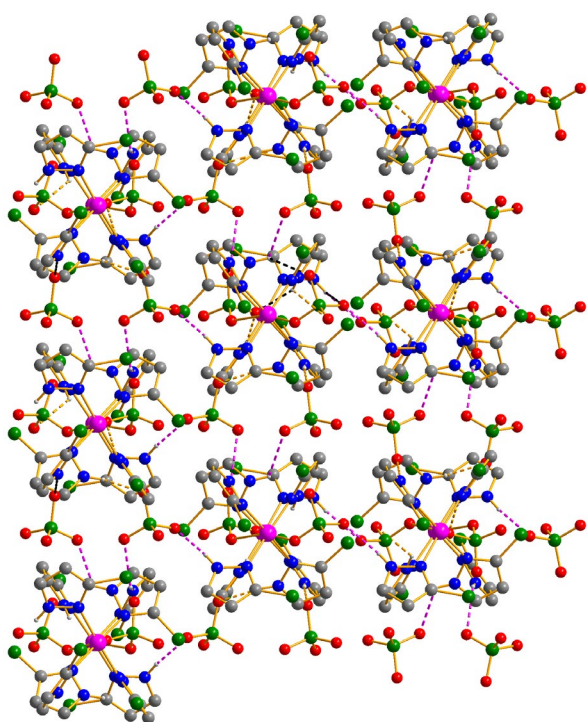

(c)

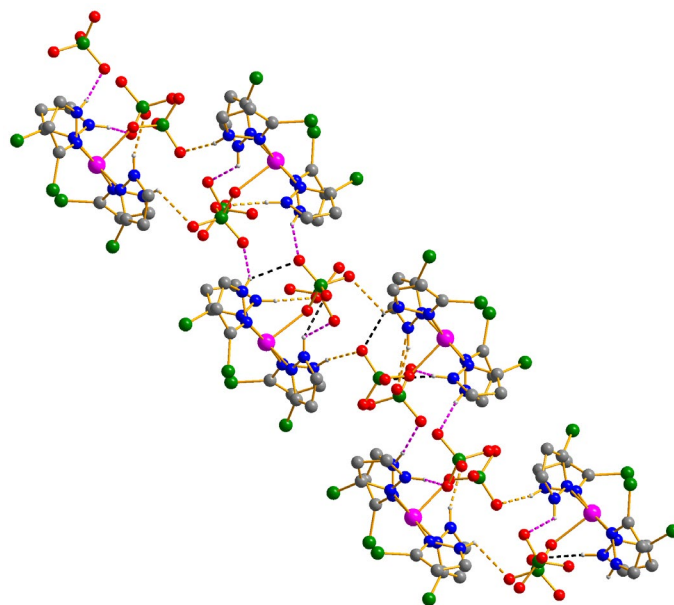

**Figure S14-2.** (a) Two-dimensional assembly of **2a** with the pink dashed lines showing the additional intermolecular hydrogen-bond interactions. Packing diagrams are depicted along the *bc* plane (b) and along the *ac* plane (c). Only the significant component is shown. The hydrogen atoms bound to carbon atoms were omitted for clarity. H-bonding: N2...O2D 2.881(8) Å, H2...O2D 2.094(5) Å, N2-H2...O2D 148.4(4)°; N8...O9F 3.047(8) Å, H8...O9F 2.550(5) Å, N8-H8...O9F 116.7(4)°; N10...O14E 2.870(7) Å, H10...O14E 1.997(5) Å, N10-H10...O14E 171.6(4)°; N12...O13F 2.986(7) Å, H12...O13F 2.388(5) Å, N12-H12...O13F 125.4(4)°. Symmetry code: D 1-x, 1-y, 1-z; E 3/2-x, 1/2+y, 3/2-z; F x, 1+y, z.

(a)

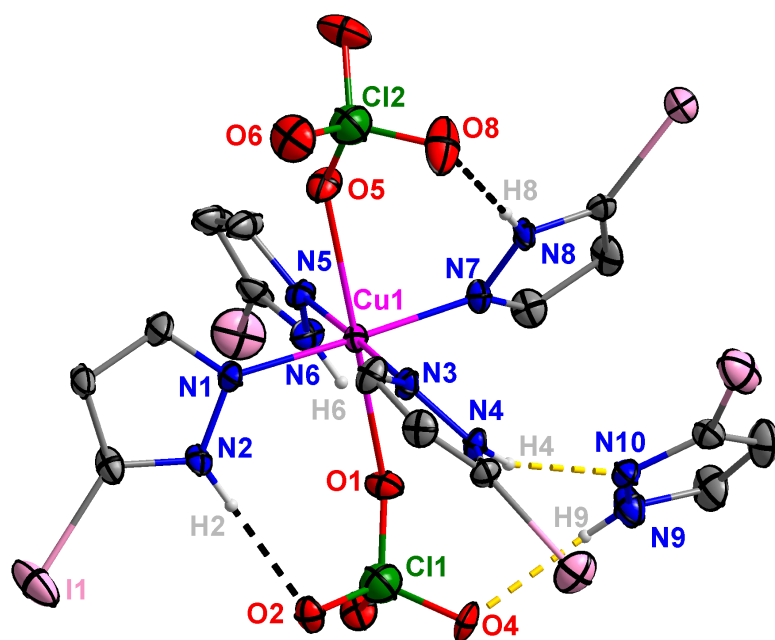

(b)

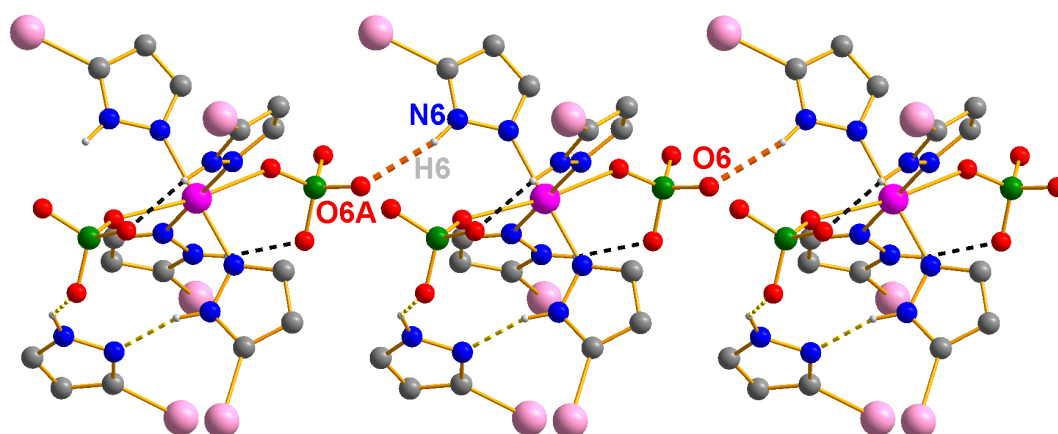

**Figure S15.** (a) ORTEP style representation of **2c** with the black and yellow dashed lines showing the intramolecular and intermolecular hydrogen-bond interactions, respectively. Thermal ellipsoids are drawn at the 35% probability level. The hydrogen atoms bound to carbon atoms were omitted for clarity. Selected bond lengths [Å] and angles [°]: Cu1-N1 2.018(7), Cu1-N3 1.995(7), Cu1-N5 2.004(7), Cu1-N7 1.990(7), Cu1-O1 2.560(6), Cu1-O5 2.502(7), N1-Cu1-N3 90.0(3), N1-Cu1-N5 88.1(3), N1-Cu1-N7 178.2(3), N1-Cu1-O1 93.6(2), N1-Cu1-O5 88.2(3), N3-Cu1-N5 178.0(3), N3-Cu1-N7 90.4(3), N3-Cu1-O1 95.3(3), N3-Cu1-O5 92.2(3), N5-Cu1-N7 91.5(3), N5-Cu1-O1 84.4(3), N5-Cu1-O5 88.3(3), N7-Cu1-O1 88.2(3), N5-Cu1-O5 90.0(3), O1-Cu1-O5 172.4(2). H-bonding: N2...O2 2.92(1), H2...O2 2.047(7), N2-H2...O2 173.1(5); N8...O8 2.85(1), H8...O8 1.995(9), N8-H8...O8 164.5(5); N9...O4 2.94(14), H9...O4 2.224(9), N9-H9...O4 137.9(6); N4...N10 2.88(1), H4...N10 2.056(8), N4-H4...N10 154.5(5). (b) One-dimensional packing diagram with the brown dashed lines showing the additional intermolecular NH...O hydrogen-bond interactions. Only the significant component is shown. H-bonding: N6...O6A 2.99(1) Å, H6...O6A 2.193(9) Å, N6-H6...O6A 151.2(6)°. Symmetry code: A 1+x, y, z.

(a)

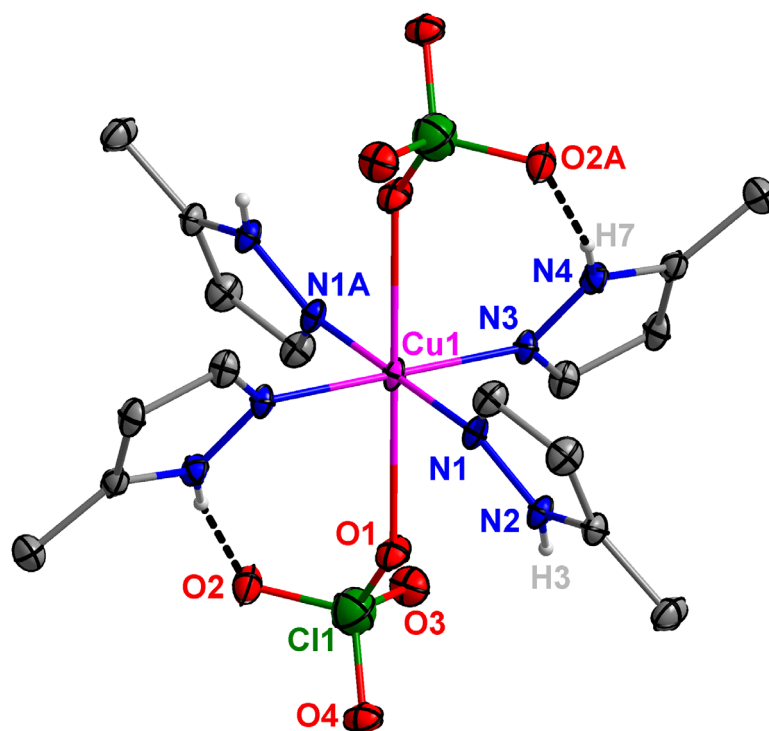

(b)

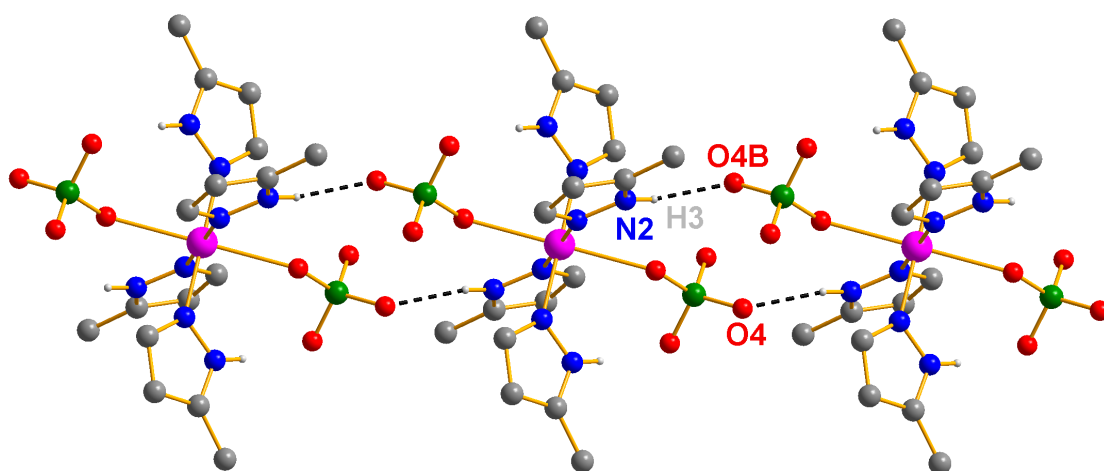

**Figure S16.** (a) ORTEP style representation of **2d** with the black dashed lines showing the intramolecular hydrogen-bond interactions. Thermal ellipsoids are drawn at the 35% probability level. The hydrogen atoms bound to carbon atoms were omitted for clarity. Selected bond lengths [Å] and angles [°]: Cu1-N1 2.002(2), Cu1-N3 1.997(2), Cu1-O1 2.4647(18), N1-Cu1-N3 88.08(9), N1-Cu1-O1 82.59(8), N1-Cu1-N1A 180.0, N1-Cu1-N3A 91.92(9), N1-Cu1-O1A 97.41(8), N3-Cu1-O1 91.70(8), N3-Cu1-N3A 180.0, N3-Cu1-O1A 88.30(8). H-bonding: N4...O2A 3.014(4), H7...O2A 2.144(3), N4-H7...O2A 169.1(2). Symmetry transformations used to generate equivalent atoms: A  $-x+1, -y+2, -z+1$ . (b) One-dimensional packing diagram with the black dashed lines showing the intermolecular NH...O hydrogen-bond interactions. Only the significant component is shown. H-bonding: N2...O4B 2.976(3) Å, H3...O4B 2.137(2) Å, N2-H3...O4B 159.3(2)°. Symmetry code: B  $1-x, 1-y, 1-z$ .

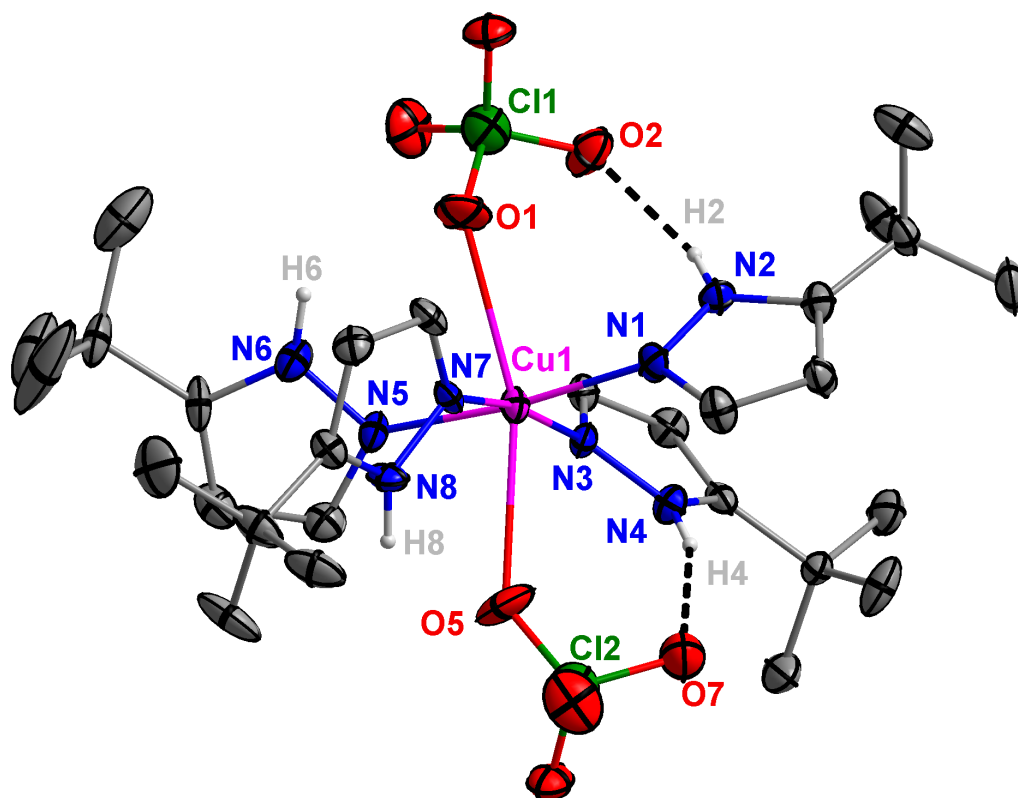

**Figure S17.** ORTEP style representation of **2e** with the black dashed lines showing the intramolecular hydrogen-bond interactions. Thermal ellipsoids are drawn at the 35% probability level. The hydrogen atoms bound to carbon atoms were omitted for clarity. Selected bond lengths [Å] and angles [°]: Cu1-N1 1.966(5), Cu1-N3 1.975(5), Cu1-N5 1.971(5), Cu1-N7 1.987(5), Cu1-O1 2.528(4), Cu1-O5 2.570(5), N1-Cu1-N3 88.71(19), N1-Cu1-N5 173.5(2), N1-Cu1-N7 92.07(19), N1-Cu1-O1 88.60(18), N1-Cu1-O5 104.55(18), N3-Cu1-N5 91.07(19), N3-Cu1-N7 170.1(2), N3-Cu1-O1 107.31(17), N3-Cu1-O5 87.20(18), N5-Cu1-N7 89.27(19), N5-Cu1-O1 85.22(18), N5-Cu1-O5 81.97(19), N7-Cu1-O1 82.55(17), N7-Cu1-O5 83.08(18), O1-Cu1-O5 160.83(15). H-bonding: N2...O2 2.930(6), H2...O2 2.10(4), N2-H2...O2 157.2(3); N4...O7 2.957(7), H4...O7 2.114(5), N4-H4...O7 160.3(3).

(a)

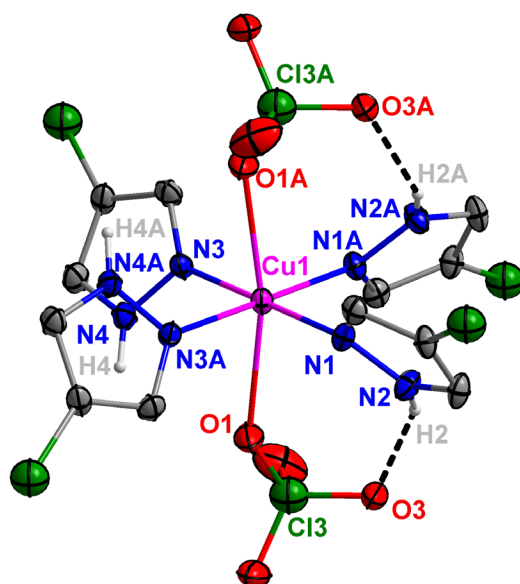

(b)

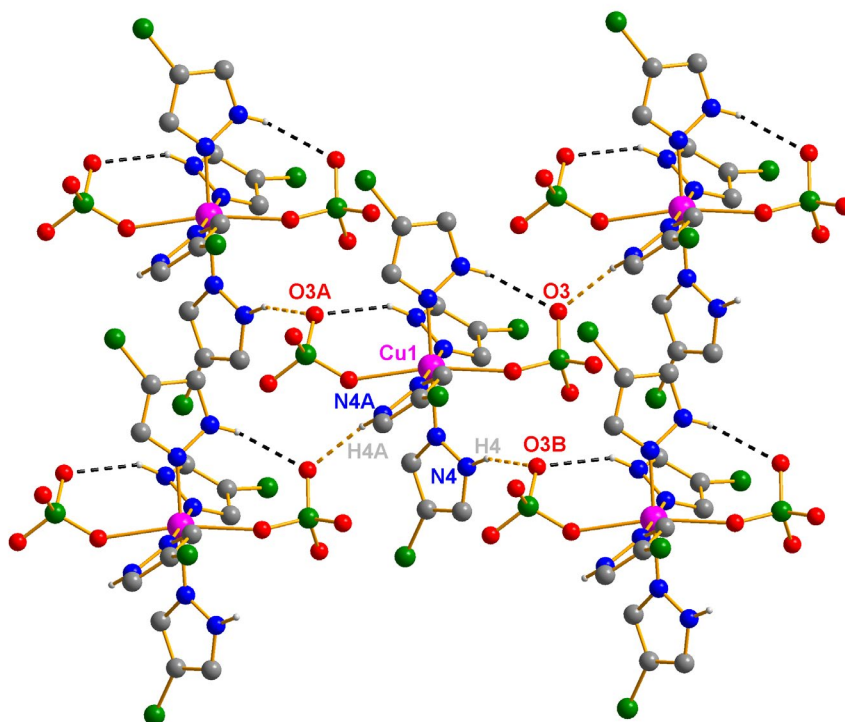

**Figure S18.** (a) ORTEP style representation of **2a'** with the black dashed lines showing the intramolecular hydrogen-bond interactions. Thermal ellipsoids are drawn at the 35% probability level. The hydrogen atoms bound to carbon atoms were omitted for clarity. Selected bond lengths [Å] and angles [°]: Cu1-N1 2.001(3), Cu1-N3 1.999(3), Cu1-O1 2.384(4), N1-Cu1-N3 179.17(16), N1-Cu1-O1 91.20(16), N1-Cu1-N1A 88.98(19), N1-Cu1-N3A 90.60(12), N1-Cu1-O1A 97.68(16), N3-Cu1-O1 88.15(16), N3-Cu1-N1A 90.60(12), N3-Cu1-N3A 89.81(19), N3-Cu1-O1A 83.04(16), O1-Cu1-O1A 167.56(17). H-bonding: N2...O3 3.040(5), H2...O3 2.253(4), N2-H2...O3 152.0(3). (b) Two-dimensional packing diagram with the yellow dashed lines showing the intermolecular NH...O hydrogen-bond interactions. Only the significant component is shown. H-bonding: N4...O3B 2.898(7) Å, H4...O3B 2.082(5) Å, N4-H4...O3B 158.2(3)°. Symmetry code: A 1-x, y, 1/2-z; B 3/2-x, 1/2+y, 1/2-z.

(a)

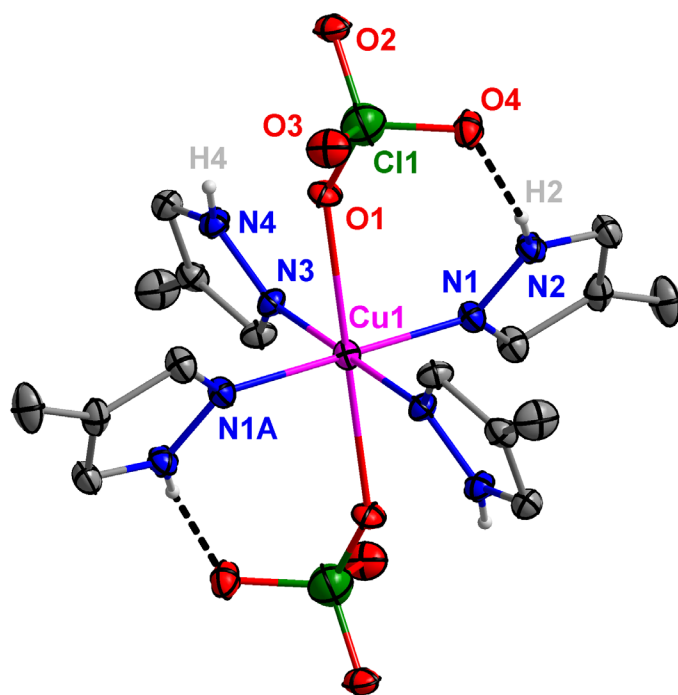

(b)

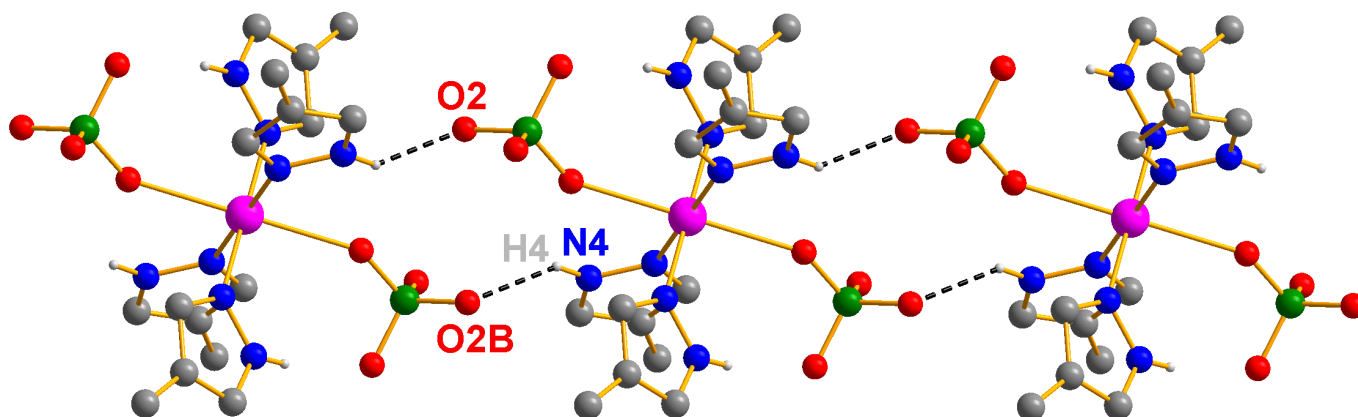

**Figure S19.** (a) ORTEP style representation of **2d'** with the black dashed lines showing the intramolecular hydrogen-bond interactions. Thermal ellipsoids are drawn at the 35% probability level. The hydrogen atoms bound to carbon atoms were omitted for clarity. Selected bond lengths [Å] and angles [°]: Cu1-N1 1.9993(14), Cu1-N3 2.0066(14), Cu1-O1 2.4411(11), N1-Cu1-N1A 180.0, N1-Cu1-N3 90.53(6), N1-Cu1-N3A 89.47(6), N1A-Cu1-N3, 89.47(6), N1A-Cu1-N3A 90.53(6), N3-Cu1-N3A 180.00(8), N1-Cu1-O1 92.88(5), N1A-Cu1-O1 87.12(5), N3-Cu1-O1 85.96(5), N3A-Cu1-O1 94.04(5). H-bonding: N2...O4 2.937(2), H2...O4 2.079(2), N2-H2...O4 164.7(1). Symmetry transformations used to generate equivalent atoms: A  $-x+2, -y+1, -z+1$ . (b) One-dimensional packing diagram with the black dashed lines showing the intermolecular NH...O hydrogen-bond interactions. Only the significant component is shown. H-bonding: N4...O2B 2.917(2) Å, H4...O2B 2.158(2) Å, N4-H4...O2B 144.1(1)°. Symmetry code: B  $2-x, -y, 1-z$ .

(a)

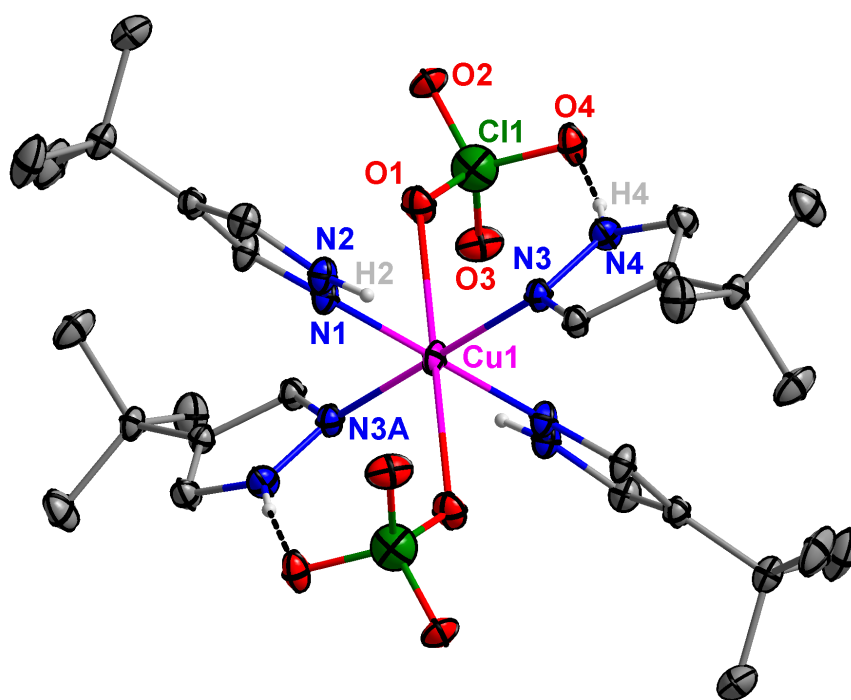

(b)

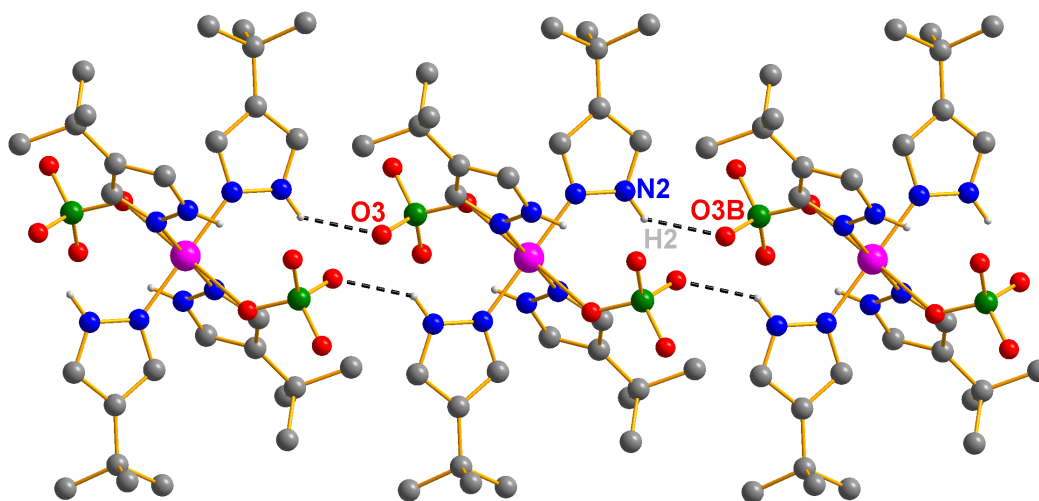

**Figure S20.** (a) ORTEP style representation of **2e'** with the black dashed lines showing the intramolecular hydrogen-bond interactions. Thermal ellipsoids are drawn at the 35% probability level. The hydrogen atoms bound to carbon atoms were omitted for clarity. Selected bond lengths [Å] and angles [°]: Cu1-N1 2.0048(13), Cu1-N1A 2.0048(13), Cu1-N3 2.0070(13), Cu1-N3A 2.0070(12), Cu1-O1 2.5033(11), N1-Cu1-N3 92.94(5), N1-Cu1-O1 82.96(5), N1-Cu1-N1A 180.0, N1-Cu1-N3A 87.06(5), N3-Cu1-O1 90.85(5), N3-Cu1-N1A 87.06(5), N3-Cu1-N3A 180.0, N3-Cu1-O1A 89.15(5), O1-Cu1-N1A 97.04(5), O1-Cu1-N3A 89.15(5). H-bonding: N4...O4 2.946(2), H4...O4 2.068(1), N4-H4...O4 174.7(1). Symmetry transformations used to generate equivalent atoms: A  $-x+1, -y+1, -z+1$ . (b) One-dimensional packing diagram with the black dashed lines showing the intermolecular NH...O hydrogen-bond interactions. Only the significant component is shown. H-bonding: N2...O3B 2.910(2) Å, H2...O3B 2.191(1) Å, N2-H2...O3B 138.7(1)°. Symmetry code: B  $1+x, y, z$ .



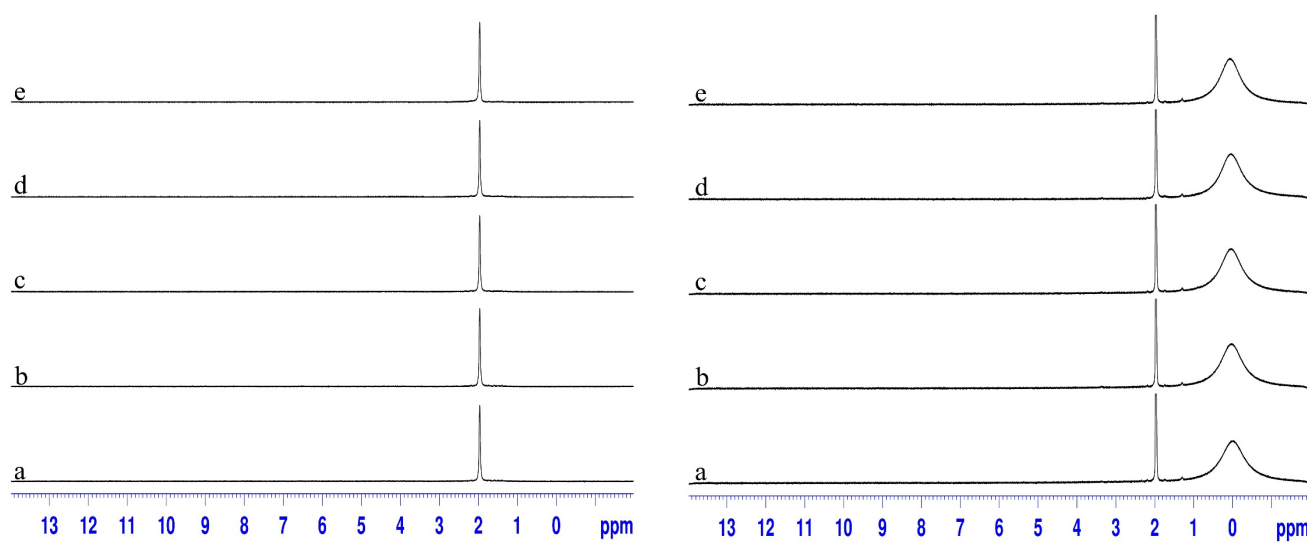

**Figure S21.** The time-dependent <sup>1</sup>H NMR spectra of **2a** (right) or **2d** (left) dissolved in *d*-MeCN at (a) 5 mins, (b) 15 mins, (c) 30 mins, (d) 45mins and (e) 60 mins.

**Table S1.** The optimized structures of predicted geometries and their energy differences for  $[\text{Cu}(\text{3(5)-ClPzH})_4]^{2+}$  with 2  $\text{ClO}_4^-$ .

|                         | $[\text{Cu}(\text{3-ClPzH})_4]^{2+}$                                                           |                                                                                    |                                                                                     | $[\text{Cu}(\text{5-ClPzH})_4]^{2+}$                                                 |                                                                                      |                                                                                      |
|-------------------------|------------------------------------------------------------------------------------------------|------------------------------------------------------------------------------------|-------------------------------------------------------------------------------------|--------------------------------------------------------------------------------------|--------------------------------------------------------------------------------------|--------------------------------------------------------------------------------------|
|                         | 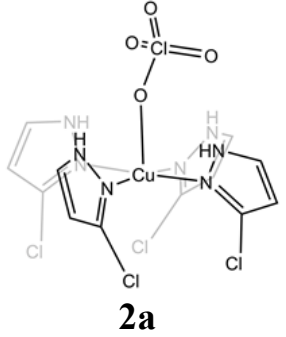<br><b>2a</b> |   |   |   |   |   |
|                         |              |  |  |  |  |  |
| $\Delta\text{Kcal/mol}$ | 97.86077436                                                                                    | 11.68453113                                                                        | 12.23289329                                                                         | 4.078783625                                                                          | 0                                                                                    | 1.633609333                                                                          |

**Table S2.** The optimized structures of predicted geometries and their energy differences for  $[\text{Cu}(\text{3(5)-MePzH})_4]^{2+}$  with 2  $\text{ClO}_4^-$ .

|                         | $[\text{Cu}(\text{3-MePzH})_4]^{2+}$ |             |            | $[\text{Cu}(\text{5-MePzH})_4]^{2+}$ |   |             |
|-------------------------|--------------------------------------|-------------|------------|--------------------------------------|---|-------------|
|                         |                                      |             |            |                                      |   |             |
|                         |                                      |             |            |                                      |   |             |
| $\Delta\text{Kcal/mol}$ | 99.66118213                          | 8.653344075 | 11.1180904 | 2.613202644                          | 0 | 0.517149816 |

**Table S3.** The summary of crystallographic data for the complexes.

|                                                                                                                                       | <b>1a</b>             | <b>1b</b>                | <b>1c</b>               | <b>1d</b>             | <b>1a'</b>           |
|---------------------------------------------------------------------------------------------------------------------------------------|-----------------------|--------------------------|-------------------------|-----------------------|----------------------|
| formula                                                                                                                               | C10 H12 Cl4 Cu N6 O8  | C10 H12 Br2 Cl2 Cu N6 O8 | C10 H12 Cl2 Cu I2 N6 O8 | C12 H18 Cl2 Cu N6 O8  | C10 H12 Cl4 Cu N6 O8 |
| fw                                                                                                                                    | 549.61                | 638.51                   | 732.51                  | 508.76                | 549.61               |
| temp, K                                                                                                                               | 150(2)                | 150(2)                   | 150(2)                  | 150(2)                | 150(2)               |
| cryst syst                                                                                                                            | Triclinic             | Monoclinic               | Monoclinic              | Monoclinic            | Triclinic            |
| space group                                                                                                                           | P-1                   | P21/n                    | P21/c                   | P21/n                 | P-1                  |
| <i>a</i> , Å                                                                                                                          | 7.0595(2)             | 7.8326(4)                | 7.9186(3)               | 7.8033(5)             | 6.5992(3)            |
| <i>b</i> , Å                                                                                                                          | 7.7575(2)             | 10.9412(7)               | 11.1291(3)              | 9.4838(6)             | 8.3622(4)            |
| <i>c</i> , Å                                                                                                                          | 9.7194(3)             | 11.5905(7)               | 13.1374(4)              | 12.8328(8)            | 9.3885(5)            |
| $\alpha$ , °                                                                                                                          | 81.015(2)             | 90                       | 90                      | 90                    | 81.900(3)            |
| $\beta$ , °                                                                                                                           | 84.024(2)             | 97.897(2)                | 117.5270(10)            | 107.447(4)            | 74.576(3)            |
| $\gamma$ , °                                                                                                                          | 68.617(2)             | 90                       | 90                      | 90                    | 74.932(3)            |
| Volume, Å <sup>3</sup> / Z                                                                                                            | 488.91(3) / 1         | 983.86(10) / 2           | 1026.69(6) / 2          | 906.00(10) / 2        | 480.83(4) / 1        |
| Density (calcd.), Mg/m <sup>3</sup>                                                                                                   | 1.867                 | 2.155                    | 2.369                   | 1.865                 | 1.898                |
| Absorption coefficient, mm <sup>-1</sup>                                                                                              | 1.716                 | 5.496                    | 4.382                   | 1.559                 | 1.745                |
| crystal size, mm                                                                                                                      | 0.120 x 0.080 x 0.020 | 0.28 x 0.10 x 0.08       | 0.18 x 0.11 x 0.09      | 0.120 x 0.060 x 0.040 | 0.18 x 0.02 x 0.02   |
| $\theta$ range, deg                                                                                                                   | 2.124 to 28.705       | 2.572 to 28.952°         | 2.531 to 28.753         | 2.717 to 28.743       | 2.257 to 28.760      |
| no. of reflns collected                                                                                                               | 7716                  | 13025                    | 15311                   | 29538                 | 6162                 |
| no. of indep reflns                                                                                                                   | 2501                  | 2559                     | 2654                    | 2352                  | 2450                 |
| max. and min. trans                                                                                                                   | 0.837 and 0.404       | 0.644 and 0.522          | 0.616 and 0.496         | 0.940 and 0.835       | 0.930 and 0.916      |
| no. of data /restraints /params                                                                                                       | 2501 / 0 / 134        | 2559 / 0 / 134           | 2654 / 0 / 134          | 2352 / 0 / 135        | 2450 / 0 / 134       |
| goodness-of-fit on <i>F</i> <sup>2</sup>                                                                                              | 0.880                 | 1.239                    | 1.272                   | 1.019                 | 1.021                |
| final <i>R</i> indices [ <i>I</i> > 2 $\sigma$ ( <i>I</i> )] <i>R</i> <sub>1</sub> <sup>a</sup> , <i>wR</i> <sub>2</sub> <sup>b</sup> | 0.0319, 0.1073        | 0.0439, 0.0829           | 0.0449, 0.0646          | 0.0368, 0.1299        | 0.0345, 0.0857       |
| <i>R</i> indices (all data), <i>R</i> <sub>1</sub> <sup>a</sup> , <i>wR</i> <sub>2</sub> <sup>b</sup>                                 | 0.0375, 0.1151        | 0.0535, 0.0848           | 0.0712, 0.0681          | 0.0475, 0.1512        | 0.0402, 0.0898       |
| largest diff. peak and hole, e Å <sup>-3</sup>                                                                                        | 0.827 and -0.567      | 0.811 and -1.244         | 1.381 and -1.309        | 0.618 and -0.380      | 0.611 and -0.469     |

$$^a R_1 = \frac{\sum |F_0| - |F_c|}{\sum |F_0|}$$

$$^b wR_2 = \frac{[\sum \omega(F_0^2 - F_c^2)^2]}{[\sum \omega(F_0^2)^2]}^{1/2}$$

|                                                | <b>1d'</b>            | <b>1e''</b>           | <b>2a</b>                      | <b>2c</b>                | <b>2d</b>             |
|------------------------------------------------|-----------------------|-----------------------|--------------------------------|--------------------------|-----------------------|
| formula                                        | C12 H18 Cl2 Cu N6 O8  | C18 H30 B2 Cu F8 N6   | C12 H12 Cl6 Cu N8 O8+[solvent] | C15 H15 Cl2 Cu I5 N10 O8 | C16 H24 Cl2 Cu N8 O8  |
| fw                                             | 508.77                | 567.64                | 672.55                         | 1232.32                  | 590.88                |
| temp, K                                        | 150(2)                | 150(2) K              | 150.04(10)                     | 150(2)                   | 150(2)                |
| cryst syst                                     | Monoclinic            | Orthorhombic          | Monoclinic                     | Monoclinic               | Triclinic             |
| space group                                    | P21/n                 | Pca2 <sub>1</sub>     | C2/c                           | Cc                       | P-1                   |
| a, Å                                           | 5.3447(3)             | 31.3023(4)            | 31.7856(3)                     | 8.9446(7)                | 8.8912(5)             |
| b, Å                                           | 13.7312(7)            | 7.10072(7)            | 9.81790(10)                    | 23.069(2)                | 8.8939(6)             |
| c, Å                                           | 13.2253(6)            | 11.71542(15)          | 31.0513(3)                     | 15.8266(11)              | 9.1265(6)             |
| α, °                                           | 90                    | 90                    | 90                             | 90                       | 90.491(4)             |
| β, °                                           | 92.850(4)             | 90                    | 97.6950                        | 94.659(3)                | 117.756(4)            |
| γ, °                                           | 90                    | 90                    | 90                             | 90                       | 110.978(4)            |
| Volume, Å <sup>3</sup> / Z                     | 969.39(9) / 2         | 2603.97(5) / 4        | 9602.85(16) / 16               | 3255.0(5) / 4            | 582.75(7) / 1         |
| Density (calcd.), Mg/m <sup>3</sup>            | 1.743                 | 1.448                 | 1.861                          | 2.515                    | 1.684                 |
| Absorption coefficient, mm <sup>-1</sup>       | 1.457                 | 1.876                 | 7.966                          | 5.631                    | 1.227                 |
| crystal size, mm                               | 0.120 x 0.040 x 0.040 | 0.220 x 0.050 x 0.050 | 0.12 x 0.08 x 0.03             | 0.360 x 0.260 x 0.150    | 0.120 x 0.080 x 0.040 |
| θ range, deg                                   | 2.139 to 28.741       | 2.823 to 74.841       | 2.806 to 74.912                | 2.854 to 27.896          | 2.581 to 28.282°.     |
| no. of reflns collected                        | 13785                 | 17905                 | 9641                           | 70701                    | 10047                 |
| no. of indep reflns                            | 2510                  | 4862                  | 9641                           | 7621                     | 2880                  |
| max. and min. trans                            | 0.906 and 0.751       | 1.00000 and 0.91336   | 1.00000 and 0.48482            | 0.237 and 0.085          | 0.920 and 0.784       |
| no. of data /restraints /params                | 2510 / 0 / 135        | 4862 / 1 / 325        | 9641 / 0 / 632                 | 7621 / 2 / 371           | 2880 / 0 / 162        |
| goodness-of-fit on F <sup>2</sup>              | 0.993                 | 1.056                 | 1.072                          | 0.918                    | 0.892                 |
| final R indices [I>2σ(I)] R1a, wR2b            | 0.0441, 0.1333        | 0.0325, 0.0822        | 0.0760, 0.3696                 | 0.0312, 0.1011           | 0.0418, 0.1186        |
| R indices (all data), R1a ,wR2b                | 0.0596, 0.1445        | 0.0351, 0.0842        | 0.0807, 0.3770                 | 0.0339, 0.1044           | 0.0535, 0.1299        |
| largest diff. peak and hole, e Å <sup>-3</sup> | 0.595 and -0.806      | 0.254 and -0.301      | 2.205 and -1.137               | 2.472 and -0.948         | 0.984 and -1.182      |

$$^a R_I = \Sigma |F_0| - |F_c| / \Sigma |F_0|$$

$$^b wR_2 = [\Sigma[\omega(F_0^2 - F_c^2)^2] / \Sigma[\omega(F_0^2)^2]]^{1/2}$$

|                                                | <b>2e</b>             | <b>2a'</b>           | <b>2d'</b>            | <b>2e'</b>            |
|------------------------------------------------|-----------------------|----------------------|-----------------------|-----------------------|
| formula                                        | C28 H48 Cl2 Cu N8 O8  | C12 H12 Cl6 Cu N8 O8 | C16 H24 Cl2 Cu N8 O8  | C28 H48 Cl2 Cu N8 O8  |
| fw                                             | 759.19                | 672.55               | 590.87                | 759.18                |
| temp, K                                        | 150(2)                | 150(2)               | 150(2)                | 150(2) K              |
| cryst syst                                     | Monoclinic            | Monoclinic           | Triclinic             | Triclinic             |
| space group                                    | P2 <sub>1</sub> /c    | C2/c                 | P-1                   | P-1                   |
| a, Å                                           | 11.8424(9)            | 13.4839(7)           | 8.6343(3)             | 8.7271(2)             |
| b, Å                                           | 23.1795(19)           | 10.0715(4)           | 8.8087(3)             | 9.8586(2)             |
| c, Å                                           | 13.7638(12)           | 19.0127(11)          | 9.9056(3)             | 12.2365(3)            |
| α, °                                           | 90                    | 90                   | 65.897(3)             | 77.454(2)             |
| β, °                                           | 94.605(7)             | 110.77               | 88.662(2)             | 85.620(2)             |
| γ, °                                           | 90                    | 90                   | 63.858(3)             | 64.130(2)             |
| Volume, Å <sup>3</sup> / Z                     | 3766.0(5) / 4         | 2414.2(2 / 4)        | 605.98(4) / 1         | 924.47(4) / 1         |
| Density (cald.), Mg/m <sup>3</sup>             | 1.339                 | 1.850                | 1.619                 | 1.364                 |
| Absorption coefficient, mm <sup>-1</sup>       | 0.776                 | 1.625                | 3.832                 | 2.630                 |
| crystal size, mm                               | 0.650 x 0.040 x 0.040 | 0.14 x 0.06 x 0.04   | 0.140 x 0.100 x 0.060 | 0.110 x 0.070 x 0.030 |
| θ range, deg                                   | 1.725 to 25.048       | 2.291 to 28.876      | 4.983 to 74.320       | 3.701 to 74.823       |
| no. of reflns collected                        | 6636                  | 3166                 | 7079                  | 10851                 |
| no. of indep reflns                            | 6636                  | 3166                 | 2325                  | 3567                  |
| max. and min. trans                            | 0.959 and 0.549       | 0.940 and 0.890      | 1.00000 and 0.86499   | 3567 / 0 / 221        |
| no. of data /restraints /params                | 6636 / 1 / 437        | 3166 / 0 / 160       | 2325 / 0 / 163        | 3567 / 0 / 221        |
| goodness-of-fit on F <sup>2</sup>              | 0.812                 | 0.982                | 0.992                 | 1.033                 |
| final R indices [I>2σ(I)] R1a, wR2b            | 0.0634, 0.1380        | 0.0601, 0.1365       | 0.0251, 0.0719        | 0.0276, 0.0740        |
| R indices (all data), R1a, wR2b                | 0.1447, 0.1643        | 0.0712, 0.1455       | 0.0256, 0.0724        | 0.0288, 0.0747        |
| largest diff. peak and hole, e Å <sup>-3</sup> | 0.864 and -0.820      | 2.242 and -1.005     | 0.246 and -0.307      | 0.328 and -0.342      |

$$^a R_I = \Sigma |F_0| - |F_c| / \Sigma |F_0|$$

$$^b wR_2 = [\Sigma[\omega(F_0^2 - F_c^2)^2] / \Sigma[\omega(F_0^2)^2]]^{1/2}$$
